**S6 Table. Statistical analyses for S2 Table.**

|                                          | Di-heteromeric Receptors |         |                               |                            | Tri-heteromeric Receptors |         |                                 |                                           |                                             |
|------------------------------------------|--------------------------|---------|-------------------------------|----------------------------|---------------------------|---------|---------------------------------|-------------------------------------------|---------------------------------------------|
|                                          | ANOVA                    |         | p value                       |                            | ANOVA                     |         | p value                         |                                           |                                             |
|                                          | F statistic              | P value | N1/N2A vs<br>N1/N2A-<br>P552R | N1/N2A vs N1-<br>P557R/N2A | F statistic               | P value | N2A/N2A vs<br>N2A-<br>P552R/N2A | N2A/N2A vs<br>N2A-<br>P552R/N2A-<br>P552R | N2A-P552R/N2A vs<br>N2A-P552R/N2A-<br>P552R |
| <b>Amplitude (peak, pA/pF)</b>           | F (2,33) = 9.869         | 0.0004  | 0.0037                        | 0.0018                     | F (2,29) = 11.37          | 0.0002  | 0.0542                          | 0.0001                                    | 0.2076                                      |
| <b>Amplitude (SS, pA/pF)*</b>            | ---                      | ---     | ---                           | 0.0073                     | ---                       | ---     | 0.0761                          | ---                                       | ---                                         |
| <b>I<sub>SS</sub>/I<sub>PEAK</sub>%*</b> | ---                      | ---     | ---                           | 0.0152                     | ---                       | ---     | 0.5758                          | ---                                       | ---                                         |
| <b>Rise time (ms)</b>                    | F (2,35) = 143.9         | <0.0001 | <0.0001                       | 0.9975                     | F (2,39) = 1369           | <0.0001 | 0.9987                          | <0.0001                                   | <0.0001                                     |
| <b>t<sub>FAST</sub> (ms)</b>             | F (2,35) = 44.7          | <0.0001 | <0.0001                       | 0.0224                     | F (2,39) = 118.5          | <0.0001 | 0.1479                          | <0.0001                                   | <0.0001                                     |
| <b>t<sub>SLOW</sub> (ms)</b>             | F (2,19) = 6.178         | 0.0086  | 0.0068                        | 0.8666                     | F (2,22) = 8.969          | 0.0014  | 0.7856                          | 0.0012                                    | 0.0061                                      |
| <b>%t<sub>FAST</sub></b>                 | F (2,35) = 6.432         | 0.0042  | 0.9517                        | 0.0044                     | F (2,39) = 2.988          | 0.062   | ---                             | ---                                       | ---                                         |
| <b>t<sub>w</sub>(ms)</b>                 | F (2,35) = 93.03         | <0.0001 | <0.0001                       | <0.0001                    | F (2,39) = 147.9          | <0.0001 | 0.0045                          | <0.0001                                   | <0.0001                                     |

\* unpaired t-tests
