# Supplementary material for: Molecular Mechanism of Disease-Associated Mutations in the Pre-M1 Helix of NMDA Receptors and Potential Rescue Pharmacology
Source: PubMed Central journal article supplement (PMC5240934; doi:10.1371/journal.pgen.1006536), 2017-01-17
Supplement: pgen.1006536.s011.pdf [file pgen.1006536.s011.pdf]

**S3 Table. Sensitivity of GluN2A-P552R to endogenous negative modulators (related to RESULTS)**

|                                                         | <b>WT N1/N2A</b> | <b>N1/N2A-P552R</b> | <b>P-value<sup>#</sup></b> |
|---------------------------------------------------------|------------------|---------------------|----------------------------|
| <b>Mg<sup>2+</sup>, IC<sub>50</sub>, μM (n)</b>         | 20 ± 3.8 (6)     | 13 ± 2.2 (8)        | 0.062                      |
| <b>Proton, I<sub>pH6.8</sub>/I<sub>pH7.6</sub>% (n)</b> | 44 ± 1.0% (12)   | 47 ± 1.6% (11)      | 0.108                      |
| <b>Zn<sup>2+</sup>, IC<sub>50</sub>, nM (n)</b>         | 27 ± 5.7 (24)    | 8.9 ± 0.4 (24)      | < 0.001                    |
| <b>%inhibition by saturating Zn<sup>2+</sup></b>        | 60 ± 2.7% (23)   | 91 ± 1.7% (22)      | < 0.001                    |

Data are from human NMDARs.

<sup>#</sup> p-values for unpaired t-tests comparing WT N1/N2A to N1/N2A-P552R
