# Supplementary material for: Molecular Mechanism of Disease-Associated Mutations in the Pre-M1 Helix of NMDA Receptors and Potential Rescue Pharmacology
Source: PubMed Central journal article supplement (PMC5240934; doi:10.1371/journal.pgen.1006536), 2017-01-17
Supplement: pgen.1006536.s013.pdf [file pgen.1006536.s013.pdf]

**S5 Table. Statistical analysis for data in Table-4.**

|                                          | Di-heteromeric NMDA Receptors | Tri-heteromeric NMDA Receptors |         |                          |                                |                                      |
|------------------------------------------|-------------------------------|--------------------------------|---------|--------------------------|--------------------------------|--------------------------------------|
|                                          | GluN2A vs GluN2A-P552R        | ANOVA                          |         | Post hoc Tukey's P-value |                                |                                      |
|                                          | unpaired t-test p value       | F statistic                    | P value | N2A/N2A vs N2A-P552R/N2A | N2A/N2A vs N2A-P552R/N2A-P552R | N2A/N2A-P552R vs N2A-P552R/N2A-P552R |
| <b>Glutamate, EC<sub>50</sub></b>        | < 0.0001                      | F (2,77) = 136.9               | <0.0001 | <0.0001                  | <0.0001                        | <0.0001                              |
| <b>Glycine, EC<sub>50</sub></b>          | < 0.0001                      | F (2,71) = 331                 | <0.0001 | <0.0001                  | <0.0001                        | <0.0001                              |
| <b>Amplitude (peak, pA/pF)</b>           | 0.9289                        | F (2,22) = 0.011               | 0.9891  | ---                      | ---                            | ---                                  |
| <b>Amplitude (SS, pA/pF)*</b>            | ---                           | ---                            | ---     | 0.6242                   | ---                            | ---                                  |
| <b>I<sub>SS</sub>/I<sub>PEAK</sub>%*</b> | ---                           | ---                            | ---     | 0.1478                   | ---                            | ---                                  |
| <b>Rise time (ms)</b>                    | < 0.0001                      | F (2,23) = 1662                | <0.0001 | 0.9958                   | <0.0001                        | <0.0001                              |
| <b>t<sub>FAST</sub> (ms)</b>             | < 0.0001                      | F (2,23) = 110.7               | <0.0001 | 0.4742                   | <0.0001                        | <0.0001                              |
| <b>t<sub>SLOW</sub> (ms)</b>             | ---                           | F (2,14) = 20.7                | <0.0001 | 0.7029                   | 0.0001                         | 0.0002                               |
| <b>%t<sub>FAST</sub></b>                 | 0.0547                        | F (2,23) = 11.12               | 0.0004  | 0.001                    | 0.9869                         | 0.0014                               |
| <b>t<sub>w</sub>(ms)</b>                 | < 0.0001                      | F (2,23) = 152.7               | <0.0001 | 0.0672                   | <0.0001                        | <0.0001                              |
| <b>Charge transfer pA ms/pF</b>          | 0.00061                       | F (2,20) = 3.707               | 0.0427  | 0.5520                   | <0.05                          | 0.1938                               |
| <b>Mean Open Time (ms)</b>               | ---                           | F (2,28) = 39.18               | <0.0001 | 0.9996                   | <0.0001                        | <0.0001                              |
| <b>Current Amplitude (pA)</b>            | ---                           | F(2,28) = 32.01                | <0.0001 | 0.4623                   | <0.0001                        | <0.0001                              |
| <b>Open t1 (ms)</b>                      | ---                           | F (2,28) = 3.816               | 0.0342  | 0.9861                   | 0.1011                         | 0.0424                               |
| <b>Open t2 (ms)</b>                      | ---                           | F (2,28) = 33.33               | <0.0001 | 0.9999                   | <0.0001                        | <0.0001                              |
| <b>Open Area 1 (%)</b>                   | ---                           | F (2,28) = 11.21               | 0.0003  | 0.9915                   | 0.0016                         | 0.0007                               |
| <b>Open probability</b>                  | 0.2184                        | ---                            | ---     | ---                      | ---                            | ---                                  |

\*unpaired t-test
