# Supplementary material for: Molecular Mechanism of Disease-Associated Mutations in the Pre-M1 Helix of NMDA Receptors and Potential Rescue Pharmacology
Source: PubMed Central journal article supplement (PMC5240934; doi:10.1371/journal.pgen.1006536), 2017-01-17
Supplement: pgen.1006536.s015.pdf [file pgen.1006536.s015.pdf]

**S7 Table. Statistical analysis for Table-6.**

|                                       | unpaired t-test p value             |                                     |
|---------------------------------------|-------------------------------------|-------------------------------------|
|                                       | GluN1/GluN2A vs. GluN1-P557R/GluN2A | GluN1/GluN2B vs. GluN1/GluN2B-P553R |
| <b>Amplitude (peak, pA/pF)</b>        | 0.0443                              | 0.5815                              |
| <b>Amplitude (SS, pA/pF)</b>          | 0.0321                              | ---                                 |
| <b><math>I_{SS}/I_{PEAK}\%</math></b> | 0.0006                              | ---                                 |
| <b>Rise time (ms)</b>                 | 0.8589                              | < 0.0001                            |
| <b><math>t_{FAST}</math> (ms)</b>     | < 0.0001                            | < 0.0001                            |
| <b><math>t_{SLOW}</math> (ms)</b>     | 0.4272                              | 0.0013                              |
| <b><math>\%t_{FAST}</math></b>        | 0.0201                              | 0.9024                              |
| <b><math>t_W</math> (ms)</b>          | < 0.0001                            | < 0.0001                            |
| <b>Charge transfer, pA·ms/pF</b>      | 0.48208                             | ---                                 |
