# Supplementary material for: Molecular Mechanism of Disease-Associated Mutations in the Pre-M1 Helix of NMDA Receptors and Potential Rescue Pharmacology
Source: PLOS journal article supplement (doi:10.1371/journal.pgen.1006536), 2017-01-17
Supplement: S4 (10.1371/journal.pgen.1006536.s004) [file journal.pgen.1006536.s004]

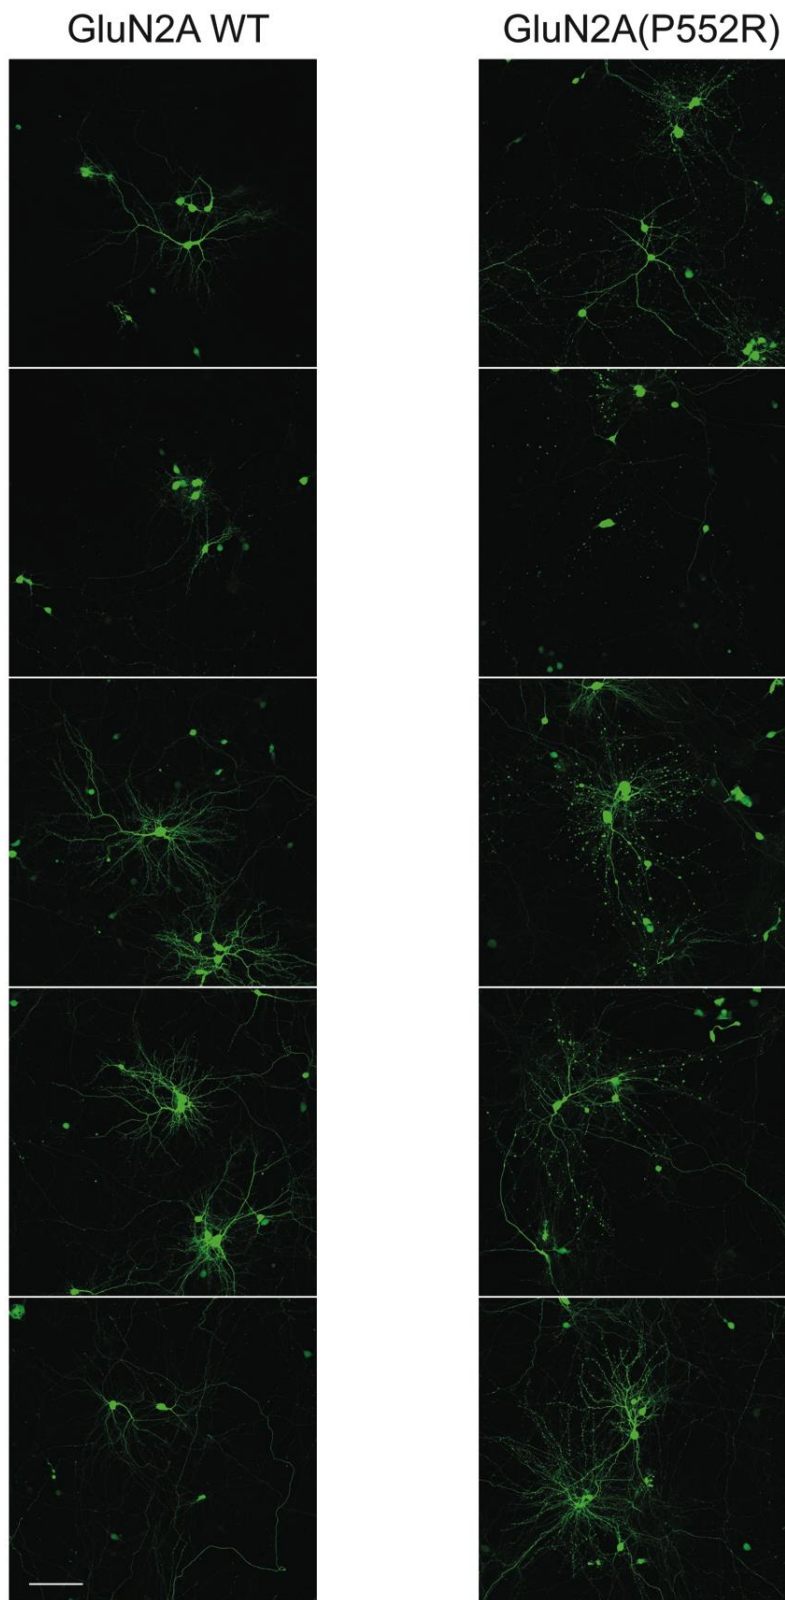

**S4 Figure. Comparison of blebbing produced by transfection of neurons with GluN2A-P552R cDNA** (related to **Figure-8, S5 Fig, and RESULTS**). Morphological features of rat cortical neurons in culture (DIV 18-19) expressing GFP and either GluN2A WT (0.6  $\mu\text{g}$ ; see **Methods** and **Fig. 8**), or GluN2A-P552R (0.6  $\mu\text{g}$ ) for 24 hours. Blebs are a telltale and nearly ubiquitous sign of neuronal expression of GluN2A-P552R, but not GluN2A WT. Panels are representative of 5 independent transfection experiments for each vector, not necessarily paired across rows. Scale bar = 100  $\mu\text{m}$ .
